# Supplementary material for: Simultaneous Determination of Xanthine and Hypoxanthine Using Polyglycine/rGO-Modified Glassy Carbon Electrode
Source: MDPI journal article supplement (doi:10.3390/molecules28031458), 2023-02-02
Supplement: s1 [file s1]

---

Supplementary Materials

**Simultaneous Determination of Xanthine and Hypoxanthine Using  
Polyglycine/rGO Modified Glassy Carbon Electrode**

Ting Wang <sup>1</sup>, Lin Zhang <sup>2</sup>, Chengyu Zhang <sup>2</sup>, Dongmei Deng <sup>2</sup>, Dejia Wang <sup>2</sup>,  
Liqiang Luo <sup>2,\*</sup>

*1 School of Health & Social Care, Shanghai Urban Construction Vocational College,  
Shanghai 201401, China*

*2 College of Sciences, Shanghai University, Shanghai 200444, China*

*\* Correspondence: luck@shu.edu.cn; Tel.: +86-21-66132404*

**Table S1.** The reproducibility of p-Gly/rGO/GCE in the determination of mixed solution containing 20  $\mu$ M XT and 20  $\mu$ M HX in 0.1 M PBS (pH 6.0).

| Analyte | Current ( $\mu$ A) | RSD (%) |
|---------|--------------------|---------|
| XT      | 0.636              | 4.31    |
|         | 0.693              |         |
|         | 0.64               |         |
|         | 0.681              |         |
|         | 0.695              |         |
| HX      | 1.698              | 5.27    |
|         | 1.894              |         |
|         | 1.725              |         |
|         | 1.722              |         |
|         | 1.876              |         |

**Table S2.** The influences on the peak currents of 20  $\mu\text{M}$  XT and 20  $\mu\text{M}$  HX in 0.1 M PBS (pH 6.0) at p-Gly/rGO/GCE.

| Interference       | Concentration<br>( $\mu\text{M}$ ) | Change in response (%) |      |
|--------------------|------------------------------------|------------------------|------|
|                    |                                    | XT                     | HX   |
| $\text{K}^+$       | 500                                | +4.7                   | +5.2 |
| $\text{Na}^+$      |                                    | +3.2                   | +4.1 |
| $\text{NO}_3^-$    |                                    | +5.1                   | +3.2 |
| $\text{Cl}^-$      |                                    | +3.6                   | +4.9 |
| $\text{SO}_4^{2-}$ |                                    | +2.5                   | +3.4 |
| $\text{CO}_3^{2-}$ |                                    | +3.9                   | +3.7 |
| L-threonine        |                                    | +4.9                   | +4.3 |
| L-arginine         |                                    | +3.2                   | +4.6 |
| Glucose            |                                    | +5.7                   | +3.6 |
| Citric acid        |                                    | −4.2                   | −5.2 |
| Ascorbic acid      |                                    | +3.6                   | +2.2 |
| Uric acid          |                                    | +5.0                   | +2.5 |
